# Supplementary material
Source: PubMed Central journal article supplement (PMC4419699)
Supplement: NIHMS683079-supplement-Supplementary_Online_Content.pdf [file NIHMS683079-supplement-Supplementary_Online_Content.pdf]

## Supplementary Online Content

Brent DA, Melhem NM, Oquendo M, et al. Familial pathways to early-onset suicide attempt: a 5.6-year prospective study. *JAMA Psychiatry*. Published online December 31, 2014. doi: 10.1001/jamapsychiatry.2014.2141.

**eTable 1.** Interview and Self-report Measures

**eTable 2.** Demographic and Clinical Characteristics of Offspring and Proband and Mood at Prior Time Point

This supplementary material has been provided by the authors to give readers additional information about their work.

**eTable 1. Interview and Self-Report Measures**

| Domain                                          | Instrument                                                                                               | Time frame covered                                         | Reference/Psychometric Properties                                                                                                                                                                                                                                                  |
|-------------------------------------------------|----------------------------------------------------------------------------------------------------------|------------------------------------------------------------|------------------------------------------------------------------------------------------------------------------------------------------------------------------------------------------------------------------------------------------------------------------------------------|
| Socioeconomic Status                            | Hollingshead Socioeconomic Status                                                                        | Current                                                    | Hollingshead A. Four factor index of social status. New Haven, CT: Yale University; 1975.<br><br>Cirino PT, Chin CE, Sevcik RA, Wolf M, Lovett M, Morris RD: Measuring Socioeconomic Status: Reliability and Preliminary Validity for Different Approaches. Assessment 2002 9: 145 |
| Current and Lifetime Axis I Disorders (DSM-IV)  | Structured Clinical Interview for DSM-IV                                                                 | Lifetime at baseline, since the last assessment thereafter | Spitzer R, Williams J, Gibbon M, First M. Structured Clinical Interview for DSM-IV (SCID). New York: Biometrics Research Department, New York State Psychiatric Institute; 1995.                                                                                                   |
|                                                 | Schedule for Affective Disorders and Schizophrenia for School-Age Children, Present and Lifetime Version | Lifetime at baseline, since the last assessment thereafter | Kaufman J, Birmaher B, Brent D, et al. Schedule for affective disorders and schizophrenia for school-age children-present and lifetime version (K-SADS-PL): Initial reliability and validity data. J Am Acad Child Adolesc Psychiatry. 1997;36(7):980-988                          |
| Current and Lifetime Axis II Disorders (DSM-IV) | Structured Clinical Interview for the DSM-IV Diagnosis of Personality Disorders                          | Lifetime at baseline, since the last assessment thereafter | First M, Spitzer R, Gibbon M, Williams J, Benjamin L. Structured clinical interview for DSM-IV Axis II personality disorders (SCID-II), (Version 2.0). New York:                                                                                                                   |

| Domain                       | Instrument                                                                  | Time frame covered                                         | Reference/Psychometric Properties                                                                                                                                                                                                                                                                                                                                                                                                                                                                                                                                                                                                                                                                                                          |
|------------------------------|-----------------------------------------------------------------------------|------------------------------------------------------------|--------------------------------------------------------------------------------------------------------------------------------------------------------------------------------------------------------------------------------------------------------------------------------------------------------------------------------------------------------------------------------------------------------------------------------------------------------------------------------------------------------------------------------------------------------------------------------------------------------------------------------------------------------------------------------------------------------------------------------------------|
|                              |                                                                             |                                                            | Biometrics Research Department, New York Psychiatric Institute; 1996.                                                                                                                                                                                                                                                                                                                                                                                                                                                                                                                                                                                                                                                                      |
| History of Suicidal Behavior | Columbia University Suicide History Form and Medical Damage Lethality Scale | Lifetime at baseline, since the last assessment thereafter | <p>Oquendo MA, Halberstam B, Mann JJ. Risk factors for suicidal behavior: The utility and limitations of research instruments. In: First MB ed. <i>Standardized evaluation in clinical practice</i>. Washington, DC: American Psychiatric Publishing; 2003:103-129.</p> <p>Posner K, Brown GK, Stanley B, et al. The Columbia-Suicide Severity Rating Scale: Initial validity and internal consistency findings from three multisite studies with adolescents and adults. <i>Am J Psychiatry</i>. 2011;168(12):1266-1277.</p> <p>Mann JJ, McBride PA, Brown RP, et al. Relationship between central and peripheral serotonin indexes in depressed and suicidal psychiatric inpatients. <i>Arch Gen Psychiatry</i>. 1992;49(6):442-446.</p> |
| Suicidal Ideation            | Scale for Suicidal Ideation                                                 | Worst in the past two weeks                                | Beck AT, Kovacs M, Weissman A. Assessment of suicidal intention: The Scale for Suicide Ideation. <i>J Consult Clin Psychol</i> . 1979;47(2):343-352                                                                                                                                                                                                                                                                                                                                                                                                                                                                                                                                                                                        |

| Domain                            | Instrument                    | Time frame covered                                         | Reference/Psychometric Properties                                                                                                                                                                                                                                                                                                                                                                                                               |
|-----------------------------------|-------------------------------|------------------------------------------------------------|-------------------------------------------------------------------------------------------------------------------------------------------------------------------------------------------------------------------------------------------------------------------------------------------------------------------------------------------------------------------------------------------------------------------------------------------------|
|                                   |                               |                                                            | <p>Kazdin AE, French NH, Unis AS, Esveltd-Dawson K, Sherick RB. Hopelessness, depression, and suicidal intent among psychiatrically disturbed inpatient children. J Consult Clin Psychol. 1983;51(4):504-510.</p> <p>Holi MM, Pelkonen M, Karlsson L, Kiviruusu O, Ruuttu T, Heilä H, Tuisku V, Marttunen M: Psychometric properties and clinical utility of the Scale for Suicidal Ideation (SSI) in adolescents. BMC Psychiatry 2005, 5:8</p> |
| Non-Suicidal Self-Injury          | Self-Injurious Behavior Scale | Lifetime at baseline, since the last assessment thereafter | Posner K, Oquendo MA, Gould M, Stanley B, Davies M. Columbia Classification Algorithm of Suicide Assessment (C-CASA): Classification of suicidal events in the FDA's pediatric suicidal risk analysis of antidepressants. Am J Psychiatry. 2007;164(7):1035-1043.                                                                                                                                                                               |
| Self-Reported Depressive Symptoms | Beck Depression Inventory     | Past two weeks                                             | <p>Beck AT, Ward CH, Mendelson M, Mock J, Erbaugh J. An inventory for measuring depression. Arch Gen Psychiatry. 1961;4:561-571.</p> <p>Beck AT, Steer RA, Garbin MG. Psychometric properties of the Beck Depression Inventory: Twenty-five years of evaluation. Clinical Psychology Review. 1988;8:77-100</p>                                                                                                                                  |

| Domain               | Instrument                      | Time frame covered        | Reference/Psychometric Properties                                                                                                                                                                                                                                                                                           |
|----------------------|---------------------------------|---------------------------|-----------------------------------------------------------------------------------------------------------------------------------------------------------------------------------------------------------------------------------------------------------------------------------------------------------------------------|
|                      |                                 |                           |                                                                                                                                                                                                                                                                                                                             |
|                      | Children's Depression Inventory | Past two weeks            | <p>Kovacs M. The Children's Depression Inventory (CDI). Psychopharmacol Bull. 1985;21(4):995-998.</p> <p>Smucker, M. R., Craighead, W. E., Craighead, L. W., &amp; Green, B. J. (1986). Normative and reliability data for the Children's Depression Inventory. Journal of abnormal child psychology, 14(1), 25-39.</p>     |
| Hopelessness         | Beck Hopelessness Scale         | Past week                 | <p>Beck AT, Weissman A, Lester D, Trexler L. The measurement of pessimism: The hopelessness scale. J Consult Clin Psychol. 1974;42(6):861-865.</p> <p>Bouvard, M, Charles S, Guerin J, Aimard G, Cottraux J: Study of Beck's hopelessness scale. Validation and factor analysis. L'Encephale 18, no. 3 (1991): 237-240.</p> |
|                      | Children's Hopelessness Scale   | Past week                 | Kazdin AE, Rodgers A, Colbus D: The hopeless scale for children: Psychometric characteristics and concurrent validity. J Consult Clin Psychol. 1986;54:241-245.                                                                                                                                                             |
| Impulsive Aggression | Buss-Durkee Hostility Inventory | Since the last assessment | Buss AH, Durkee A. An inventory for assessing different kinds of hostility. J                                                                                                                                                                                                                                               |

| Domain               | Instrument                                   | Time frame covered                         | Reference/Psychometric Properties                                                                                                                                                              |
|----------------------|----------------------------------------------|--------------------------------------------|------------------------------------------------------------------------------------------------------------------------------------------------------------------------------------------------|
|                      |                                              |                                            | Consult Psychol. 1957;21(4):343-349.<br><br>Vassar M1, Hale W.: Reliability reporting across studies using the Buss Durkee Hostility Inventory. J Interpers Violence. 2009 Jan;24(1):20-37     |
|                      | Children's Hostility Inventory               | Since the last assessment                  | Kazdin AE, Rodgers A, Colbus D, Siegel T. Children's hostility inventory: Measurement of aggression and hostility in psychiatric inpatient children. J Clin Child Psychol. 1987;16(4):320-328. |
| Impulsivity          | Barratt Impulsivity Scale                    | Since the last assessment                  | Barratt ES: Factor analysis of some psychometric measures of impulsiveness and anxiety. Psychol Rep. 1965;16:547-554.                                                                          |
|                      | Conners' Teacher Rating Scale                | Since the last assessment                  | Pelham Jr WE, Milich R, Murphy DA, Murphy HA: Normative data on the IOWA Conners teacher rating scale. J Clin Child Psychol. 1989;18(3):259-262.                                               |
| Aggression           | Brown-Goodwin Lifetime History of Aggression | Lifetime at baseline, past year thereafter | Brown GL, Goodwin FK. Human aggression and suicide. Suicide Life Threat Behav. 1986;16(2):223-243.                                                                                             |
| Negative Life Events | Social Readjustment Rating Scale             | Past year                                  | Lewinsohn PM, Rohde P, Seeley JR, Fischer SA. Age and depression: Unique and shared effects. Psychol Aging. 1991;6(2):247-260.                                                                 |

| Domain                    | Instrument                                         | Time frame covered        | Reference/Psychometric Properties                                                                                                                                                                                                                                                                                     |
|---------------------------|----------------------------------------------------|---------------------------|-----------------------------------------------------------------------------------------------------------------------------------------------------------------------------------------------------------------------------------------------------------------------------------------------------------------------|
|                           | Life Events Checklist                              | Past year                 | Brand AH, Johnson JH: Note on reliability of the Life Events Checklist. Psychol Rep. 1982;50:1274.                                                                                                                                                                                                                    |
| Social Support            | Survey of Children's Social Support                | Since the last assessment | Dubow E, Ullman D. Assessing social support in elementary school children: The survey of children's social support. J Clin Child Psychol. 1989;18:52-64.                                                                                                                                                              |
|                           | Multidimensional Scale of Perceived Social Support | Since the last assessment | Zimet G, Dahlem N, Zimet S, Farley G. The Multidimensional Scale of Perceived Social Support. J Pers Assess. 1988;52:30-41.<br><br>Zimet GD, Powell SS, Farley GK, Werkman S, Berkoff KA. Psychometric characteristics of the multidimensional scale of perceived social support. J Per Assess. 1990;55(3-4):610-617. |
| Reasons for Staying Alive | Reasons for Living Inventory                       | Since the last assessment | Ivanoff A, Jang S, Smyth N, Linehan M. Fewer reasons for staying alive when you are thinking of killing yourself: The Brief Reasons for Living Inventory. J Psychopathol Behav Assess. 1994;16:1-13.                                                                                                                  |
|                           | Adolescent Reasons for Living                      | Since the last assessment | Osman A, Downs WR, Kopper BA, et al. The Reasons for Living Inventory for                                                                                                                                                                                                                                             |

| Domain                               | Instrument                                          | Time frame covered        | Reference/Psychometric Properties                                                                                                                                                    |
|--------------------------------------|-----------------------------------------------------|---------------------------|--------------------------------------------------------------------------------------------------------------------------------------------------------------------------------------|
|                                      | Inventory                                           |                           | Adolescents (RFL-A): Development and psychometric properties. J Clin Psychol. 1998;54(8):1063-1078.                                                                                  |
| Family Climate                       | Family Assessment of Cohesion Evaluation Scale - II | Since the last assessment | Olsen D, Portner J, Bell R. Family Adaptability and Cohension Evaluation Scales (FACES-II). St. Paul,MN: Family Social Science, University of Minnesota; 1982.                       |
| History of Physical and Sexual Abuse | Childhood Trauma Questionnaire                      | Ever                      | Bernstein DP, Fink L, Handelsman L, Foote J: Initial reliability and validity of a new retrospective measure of child abuse and neglect. Am J Psychiatry. 1994;151:1132-1136.        |
|                                      | Abuse Dimensions Inventory                          |                           | Chaffin M, Wherry J, Newlin C, Crutchfield A, Dykman R. The Abuse Dimensions Inventory: Initial data on a research measure of abuse severity. J Interpers Violence. 1997;12:569–589. |

**eTable 2. Demographic and Clinical Characteristics of Offspring and Proband and Offspring Mood at Prior Time Point<sup>§</sup>**

|                                           | Baseline          |                    | Intermediate Time Points |                    |
|-------------------------------------------|-------------------|--------------------|--------------------------|--------------------|
|                                           | OR (95% CI)       | P                  | OR (95% CI)              | P                  |
| <b>OFFSPRING</b>                          |                   |                    |                          |                    |
| Age                                       | 1.01 (0.99-1.03)  | .47                |                          |                    |
| Sex                                       | 1.56 (1.06-2.30)  | .02                |                          |                    |
| Caucasian                                 | 0.75 (0.49-1.15)  | .19                |                          |                    |
| Hispanic                                  | 1.97 (1.03-3.76)  | .04                |                          |                    |
| Site <sup>†</sup>                         | 0.84 (0.54-1.28)  | .42                |                          |                    |
| Mood disorder                             | 6.59 (4.44-9.78)  | <.001 <sup>a</sup> | 28.92 (16.07-52.05)      | <.001 <sup>a</sup> |
| ADHD                                      | 1.42 (0.78-2.60)  | .26                | 1.12 (0.63-1.98)         | .71                |
| PTSD                                      | 3.45 (1.80-6.63)  | <.001 <sup>a</sup> | 7.20 (3.65-14.20)        | <.001 <sup>a</sup> |
| Anxiety disorder                          | 2.76 (1.82-4.16)  | <.001 <sup>a</sup> | 6.23 (4.08-9.53)         | <.001 <sup>a</sup> |
| Eating disorder                           | 9.82 (2.58-37.44) | .001 <sup>c</sup>  |                          |                    |
| Alcohol/substance abuse                   | 1.69 (1.02-2.80)  | .04                | 3.31 (2.02-5.42)         | <.001 <sup>a</sup> |
| Behavioral/antisocial                     | 2.59 (1.56-4.27)  | <.001 <sup>a</sup> | 1.45 (0.86-2.42)         | .16                |
| Depression - self report                  |                   |                    | 2.75 (2.11-3.60)         | <.001 <sup>a</sup> |
| Hopelessness                              |                   |                    | 2.10 (1.68-2.63)         | <.001 <sup>a</sup> |
| Impulsivity                               | 1.78 (1.43-2.21)  | <.001 <sup>a</sup> | 1.78 (1.38-2.29)         | <.001 <sup>a</sup> |
| Impulsive aggression                      | 1.70 (1.37-2.12)  | <.001 <sup>a</sup> | 2.49 (1.91-3.24)         | <.001 <sup>a</sup> |
| Aggression                                | 1.61 (1.34-1.94)  | <.001 <sup>a</sup> | 1.63 (1.30-2.03)         | <.001 <sup>a</sup> |
| Negative life events                      |                   |                    | 1.55 (1.22-1.97)         | <.001 <sup>a</sup> |
| Reasons for living                        |                   |                    | 0.96 (0.75-1.23)         | .74                |
| Social support                            |                   |                    | 0.77 (0.60-0.98)         | .03                |
| Family adaptability/cohesion              |                   |                    | 0.95 (0.92-0.98)         | .002 <sup>c</sup>  |
| Non-suicidal self-injurious behavior      | 2.14 (1.06-4.30)  | .03                | 2.89 (1.36-6.14)         | .006 <sup>c</sup>  |
| Lifetime history of physical/sexual abuse | 2.96 (1.86, 4.71) | <.001 <sup>a</sup> |                          |                    |
| History of suicide attempt*               | 5.34 (2.49-11.45) | <.001 <sup>a</sup> |                          |                    |

|                                           | Baseline          |                   | Intermediate      |                    |
|-------------------------------------------|-------------------|-------------------|-------------------|--------------------|
|                                           | OR (95% CI)       | P                 | OR (95% CI)       | P                  |
| History of other suicidal events*         | 3.74 (1.46-9.59)  | .006              |                   |                    |
| Suicidal ideation                         | 1.03 (0.93-1.13)  | .58               | 1.26 (1.13-1.40)  | <.001 <sup>a</sup> |
| <b>OFFSPRING</b>                          |                   |                   |                   |                    |
| Suicide related behavior                  |                   |                   | 4.84 (2.32-10.12) | <.001 <sup>a</sup> |
| <b>PROBAND</b>                            |                   |                   |                   |                    |
| Mood disorder                             | 2.51 (1.07-5.91)  | .04               | 3.35 (1.71-6.55)  | <.001 <sup>a</sup> |
| Alcohol/substance abuse                   | 1.29 (0.85-1.97)  | .23               | 1.41 (0.88-2.27)  | .15                |
| Post Traumatic Stress Disorder            | 1.61 (1.05-2.47)  | .03               | 2.14 (1.39-3.30)  | .001 <sup>b</sup>  |
| Anxiety disorder                          | 1.63 (1.03-2.58)  | .04               | 2.29 (1.45-3.62)  | <.001 <sup>a</sup> |
| Cluster-B personality disorder            | 2.04 (1.25-3.34)  | .004 <sup>c</sup> |                   |                    |
| Lifetime history of physical/sexual abuse | 1.60 (0.92, 2.75) | .09               |                   |                    |
| Impulsivity                               | 1.02 (1.01-1.03)  | .001 <sup>b</sup> | 1.02 (1.01-1.03)  | .002 <sup>c</sup>  |
| Impulsive aggression                      | 1.01 (0.99-1.03)  | .30               | 1.02 (1.00-1.04)  | .02                |
| Aggression                                | 1.11 (0.91-1.35)  | .30               | 1.23 (0.95-1.58)  | .12                |

<sup>§</sup>Time point immediately prior to the onset of an actual attempt or maximum time point for non-attempters. <sup>†</sup>NY is the reference site (=0). \* compared to “No event”.

<sup>a</sup>q-value<.001. <sup>b</sup>q-value<.01. <sup>c</sup>q-value<.05

OR: odds ratio. CI: confidence interval.
